# Supplementary material for: Towards three-dimensional hierarchical ZnO nanofiber@Ni(OH)2 nanoflake core–shell heterostructures for high-performance asymmetric supercapacitors
Source: Royal Society of Chemistry journal article supplement (doi:10.1039/c5ta04311e), 2015-01-01
Supplement: c5ta04311e1.pdf [file c5ta04311e1.pdf]

## Supporting Information

### **Towards three-dimensional hierarchical ZnO nanofiber@Ni(OH)<sub>2</sub> nanoflake core-shell heterostructures for high-performance asymmetric supercapacitors**

Hao Niu, Dan Zhou, Xue Yang, Xin Li, Qian Wang\*, Fengyu Qu\*

*Key Laboratory of Design and Synthesis of Functional Materials and Green Catalysis, College of  
Chemistry and Chemical Engineering, Harbin Normal University, Harbin 150025, China*

---

\*Corresponding authors. Tel. /fax: +86 451 88060653.

E-mail addresses: wangqianhrb@163.com (Q. Wang), qufengyuhsd@163.com (F.Y. Qu).

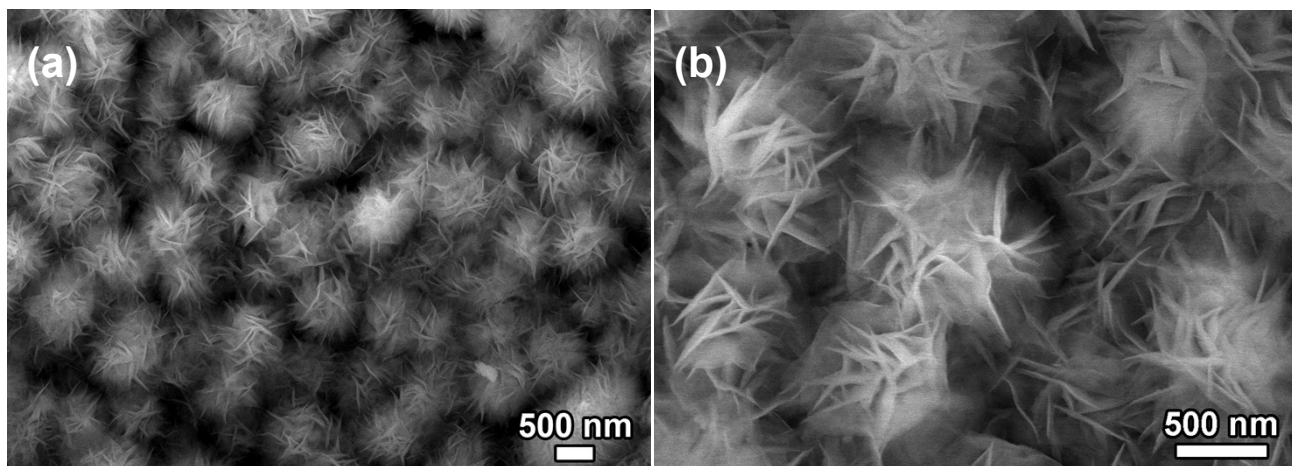

**Fig. S1** (a and b) SEM images of pure Ni(OH)<sub>2</sub> prepared without the presence of ZnO nanofibers.

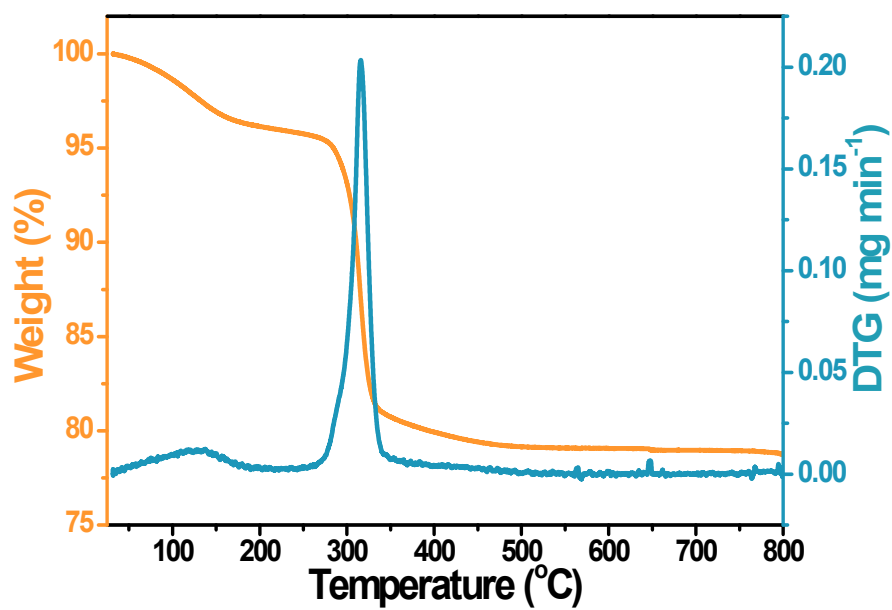

**Fig. S2** TGA and DTG profiles of the ZnO@Ni(OH)<sub>2</sub> hybrid.

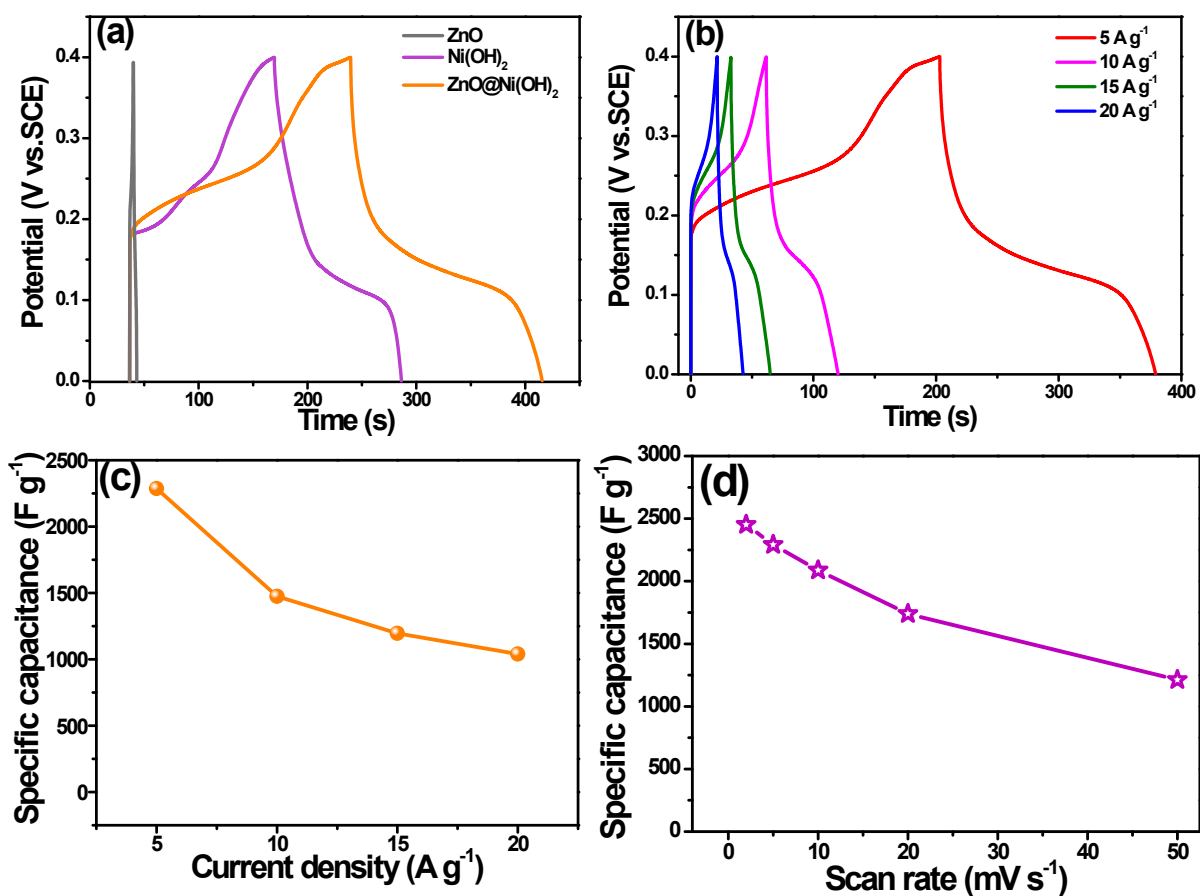

**Fig. S3** (a) Galvanostatic charge-discharge curves of ZnO, Ni(OH)<sub>2</sub> and ZnO@Ni(OH)<sub>2</sub> hybrid at the current density of 5 A g<sup>-1</sup>. (b) Galvanostatic charge-discharge curves of the ZnO@Ni(OH)<sub>2</sub> hybrid at various current densities. (c) Average specific capacitances of the as-prepared electrodes at various current density. (d) Average specific capacitances estimated based on the mass of Ni(OH)<sub>2</sub> in the hybrid.

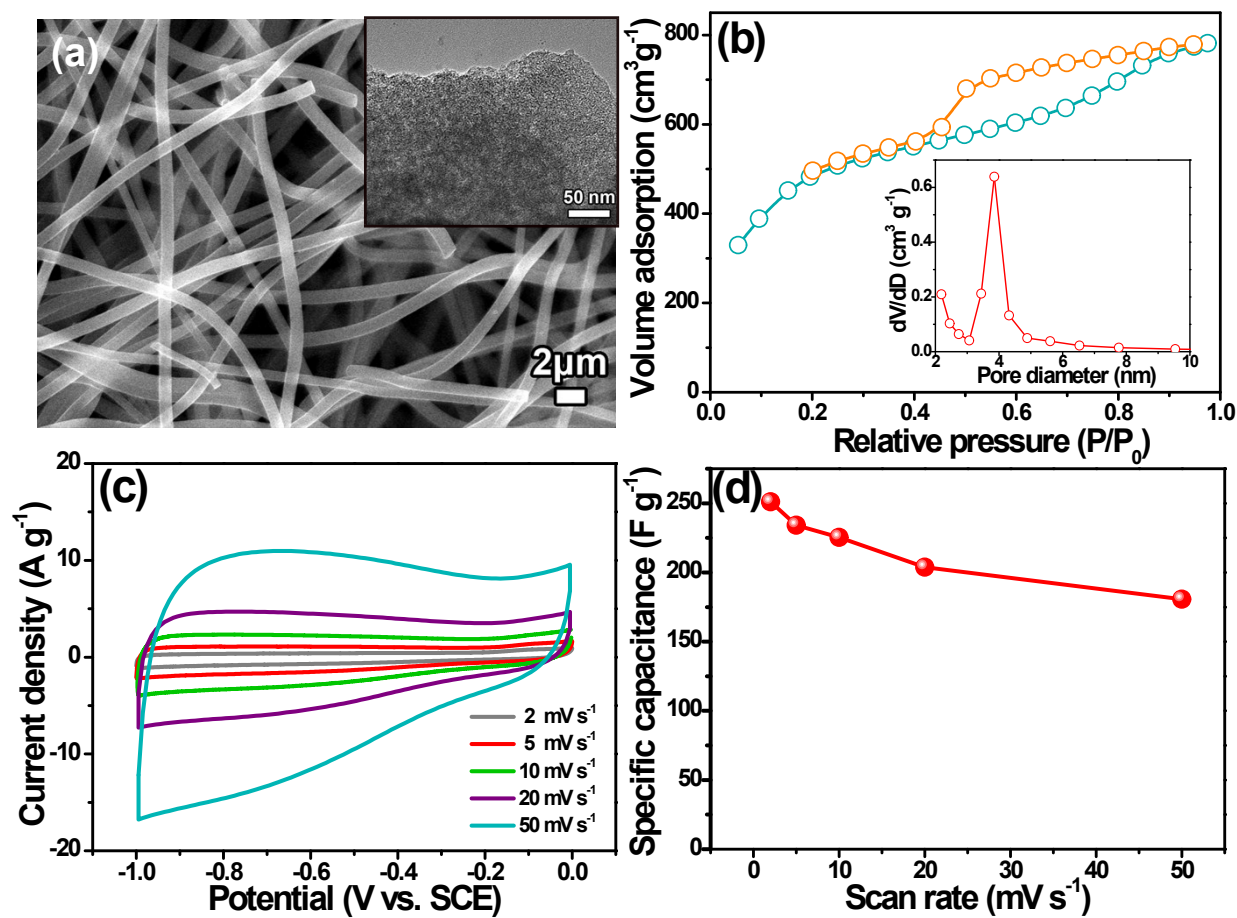

**Fig. S4** (a) SEM and TEM images of representative PCNFs. (b) Nitrogen adsorption/desorption isotherm and pore size distribution curve for PCNFs. (c) CV curves and (d) specific capacitances of the PCNF electrode at various scan rates.

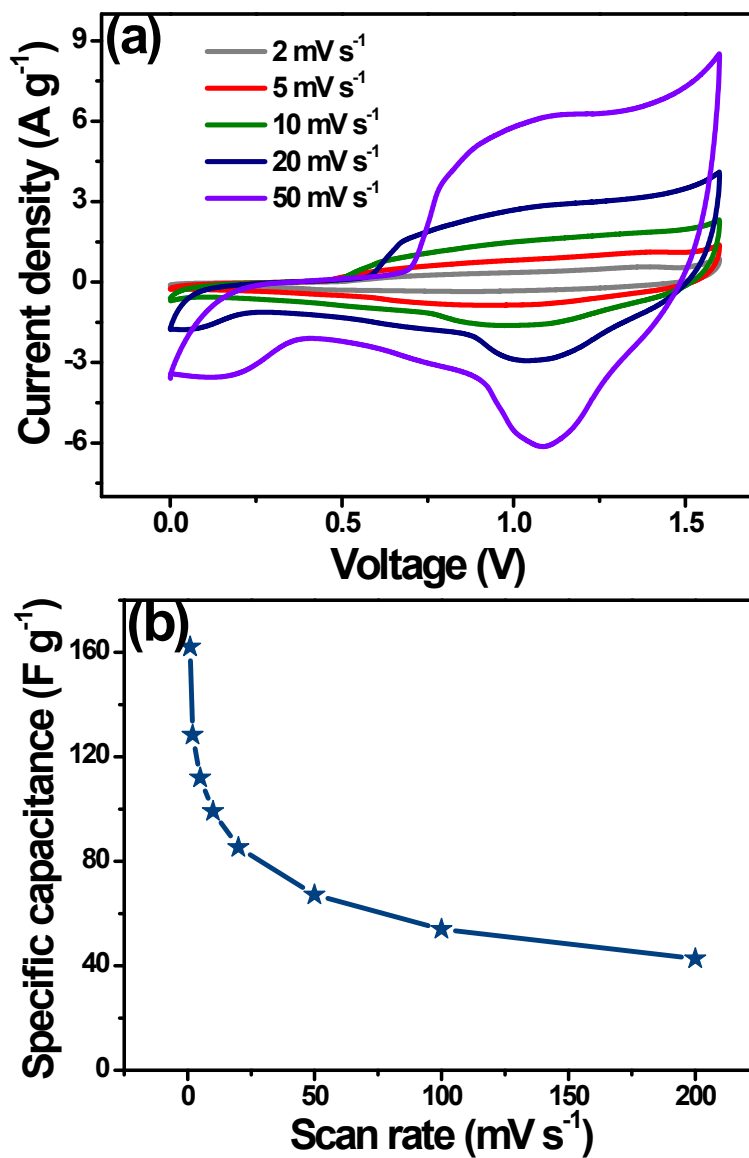

**Fig. S5** (a) CV curves and (b) specific capacitance of the fabricated ZnO@Ni(OH)<sub>2</sub>/PCNF asymmetric supercapacitor at various scan rates.

**Table S1.** Comparison of the capacitance and rate capability of the ZnO@Ni(OH)<sub>2</sub> with previously reported Ni(OH)<sub>2</sub> materials.

| Materials                             | Capacitance (F g <sup>-1</sup> ) | Rate capability (%)          | Ref.      |
|---------------------------------------|----------------------------------|------------------------------|-----------|
| $\alpha$ -Ni(OH) <sub>2</sub>         | 805 (5 mV s <sup>-1</sup> )      | 33 (40 mV s <sup>-1</sup> )  | 1         |
| Ni(OH) <sub>2</sub> /GO               | 1355 (2.8 A g <sup>-1</sup> )    | 71 (45.7 A g <sup>-1</sup> ) | 2         |
| Ni(OH) <sub>2</sub> /MWCNT            | 1487 (5 mV s <sup>-1</sup> )     | 67 (100 mV s <sup>-1</sup> ) | 3         |
| CNT@NiCo <sub>2</sub> O <sub>4</sub>  | 1038 (0.5 A g <sup>-1</sup> )    | 36 (10 A g <sup>-1</sup> )   | 4         |
| Ni(OH) <sub>2</sub> -MnO <sub>2</sub> | 2628 (3 A g <sup>-1</sup> )      | 50 (20 A g <sup>-1</sup> )   | 5         |
| MWCNT/amor-Ni(OH) <sub>2</sub>        | 3262 (5 mV s <sup>-1</sup> )     | 71 (100 mV s <sup>-1</sup> ) | 6         |
| Nickel-cobalt oxide                   | 1227 (5 mA cm <sup>-2</sup> )    | 26 (50 mA cm <sup>-2</sup> ) | 7         |
| coin-like Ni(OH) <sub>2</sub>         | 1532 (0.2 A g <sup>-1</sup> )    | 55 (4 A g <sup>-1</sup> )    | 8         |
| GNS/Ni(OH) <sub>2</sub>               | 1954 (5 mV s <sup>-1</sup> )     | 43 (20 mV s <sup>-1</sup> )  | 9         |
| ZnO@Ni(OH) <sub>2</sub>               | 2218 (2 mV s <sup>-1</sup> )     | 49 (50 mV s <sup>-1</sup> )  | This work |

**Table S2.** Comparison of the electrolyte, voltage range, maximum energy densities, corresponding average power densities and cycling life with some reported nickel hydroxide based asymmetric supercapacitors.

| Asymmetric supercapacitor                                 | Electrolyte (mol L <sup>-1</sup> ) | Voltage (V) | <i>E</i> (Wh kg <sup>-1</sup> ) | <i>P</i> (W kg <sup>-1</sup> ) | Cycle life  | Ref.      |
|-----------------------------------------------------------|------------------------------------|-------------|---------------------------------|--------------------------------|-------------|-----------|
| Ni(OH) <sub>2</sub> /graphene//RuO <sub>2</sub> /graphene | 1 M KOH                            | 1.5         | 48                              | 230                            | 92% (5000)  | 10        |
| Zn-Co-Ni(OH) <sub>2</sub> /AC//AC                         | 6 M KOH                            | 1.6         | 35.7                            | 900                            | 80% (1000)  | 11        |
| α-Ni(OH) <sub>2</sub> //AC                                | 2 M KOH                            | 1.6         | 42.3                            | 110                            | 82% (1000)  | 12        |
| Ni(OH) <sub>2</sub> /graphene//graphene                   | 6 M KOH                            | 1.6         | 77.8                            | 175                            | 94% (3000)  | 13        |
| Ni(OH) <sub>2</sub> //CNT-AC                              | 6 M KOH                            | 1.8         | 50.6                            | 95                             | 83% (3000)  | 14        |
| Co-Ni/graphene//AC/CNT                                    | 2 M KOH                            | 1.4         | 41                              | 210                            | –           | 15        |
| Ni(OH) <sub>2</sub> /graphene//CNTs                       | 1 M KOH                            | 1.5         | 58.5                            | 780                            | 86% (30000) | 6         |
| Co <sub>3</sub> O <sub>4</sub> @Ni(OH) <sub>2</sub> //RGO | 6 M KOH                            | 1.6         | 18.54                           | 1860                           | 86% (1000)  | 16        |
| Ni(OH) <sub>2</sub> /MnO <sub>2</sub> /RGO//FRGO          | 1 M KOH                            | 1.6         | 54                              | 390                            | 75% (2000)  | 17        |
| Ni-Co oxide//APDC                                         | 1 M LiOH                           | 2.0         | 54                              | 110                            | 96% (5000)  | 18        |
| Ni(OH) <sub>2</sub> /UGF//a-MEGO                          | 6 M KOH                            | 1.6         | 6.9                             | 44000                          | 63% (10000) | 19        |
| Ni(OH) <sub>2</sub> //AC                                  | 1 M KOH                            | 1.3         | 35.7                            | 490                            | 97% (5000)  | 20        |
| ZnO@Ni(OH) <sub>2</sub> //PCNFs                           | 6 M KOH                            | 1.6         | 57.6                            | 129.7                          | 94% (2000)  | This work |

## References

1. J. W. Lee, J. M. Ko and J.-D. Kim, *J. Phys. Chem. C*, 2011, **115**, 19445-19454.
2. H. Wang, H. S. Casalongue, Y. Liang and H. Dai, *J. Am. Chem. Soc.*, 2010, **132**, 7472-7477.
3. D. P. Dubal, G. S. Gund, C. D. Lokhande and R. Holze, *ACS Appl. Mater. Interfaces*, 2013, **5**, 2446-2454.
4. F. Cai, Y. Kang, H. Chen, M. Chen and Q. Li, *J. Mater. Chem. A*, 2014, **2**, 11509-11515.
5. H. Chen, L. Hu, Y. Yan, R. Che, M. Chen and L. Wu, *Adv. Energy Mater.*, 2013, **3**, 1636-1646.
6. W. Jiang, D. Yu, Q. Zhang, K. Goh, L. Wei, Y. Yong, R. Jiang, J. Wei and Y. Chen, *Adv. Funct.*



- Mater.*, 2015, **25**, 1063-1073.
7. L. Kong, L. Deng, J. Lang, X. Ji, Y. Luo and L. Kang, *Chin. J. Chem.*, 2012, **30**, 570-576.
  8. H. Li, S. Liu, C. Huang, Z. Zhou, Y. Li and D. Fang, *Electrochim. Acta*, 2011, **58**, 89-94.
  9. H. Yan, J. Bai, J. Wang, X. Zhang, B. Wang, Q. Liu and L. Liu, *CrystEngComm*, 2013, **15**, 10007-10015.
  10. H. Wang, Y. Liang, T. Mirfakhrai, Z. Chen, H. S. Casalongue and H. Dai, *Nano Res.*, 2011, **4**, 729-736.
  11. J. H. Park, S. Kim, O. O. Park and J. M. Ko, *Appl. Phys. A*, 2005, **82**, 593-597.
  12. J.-W. Lang, L.-B. Kong, M. Liu, Y.-C. Luo and L. Kang, *J. Solid State Electr.*, 2009, **14**, 1533-1539.
  13. J. Yan, Z. Fan, W. Sun, G. Ning, T. Wei, Q. Zhang, R. Zhang, L. Zhi and F. Wei, *Adv. Funct. Mater.*, 2012, **22**, 2632-2641.
  14. Z. Tang, C.-h. Tang and H. Gong, *Adv. Funct. Mater.*, 2012, **22**, 1272-1278.
  15. Y. Cheng, H. Zhang, C. V. Varanasi and J. Liu, *Energy Environ. Sci.*, 2013, **6**, 3314-3321.
  16. C. H. Tang, X. Yin and H. Gong, *ACS Appl. Mater. Interfaces*, 2013, **5**, 10574-10582.
  17. H. Chen, S. Zhou and L. Wu, *ACS Appl. Mater. Interfaces*, 2014, **6**, 8621-8630.
  18. I. Shakir, Z. Ali, J. Bae, J. Park and D. J. Kang, *RSC Adv.*, 2014, **4**, 6324-6243.
  19. J. Ji, L. L. Zhang, H. Ji, Y. Li, X. Zhao, X. Bai, X. Fan, F. Zhang and R. S. Ruoff, *ACS Nano*, 2013, **7**, 6237-6243.
  20. H. B. Li, M. H. Yu, F. X. Wang, P. Liu, Y. Liang, J. Xiao, C. X. Wang, Y. X. Tong and G. W. Yang, *Nat. Commun.*, 2013, **4**, 1894.
